# Supplementary material for: Natural deep eutectic solvents as a green extraction of polyphenols from spent coffee ground with enhanced bioactivities
Source: PubMed Central journal article supplement (PMC9874221; doi:10.3389/fpls.2022.1072592), 2023-01-11
Supplement: DataSheet_1.pdf [file DataSheet_1.pdf]

## Supplementary Material

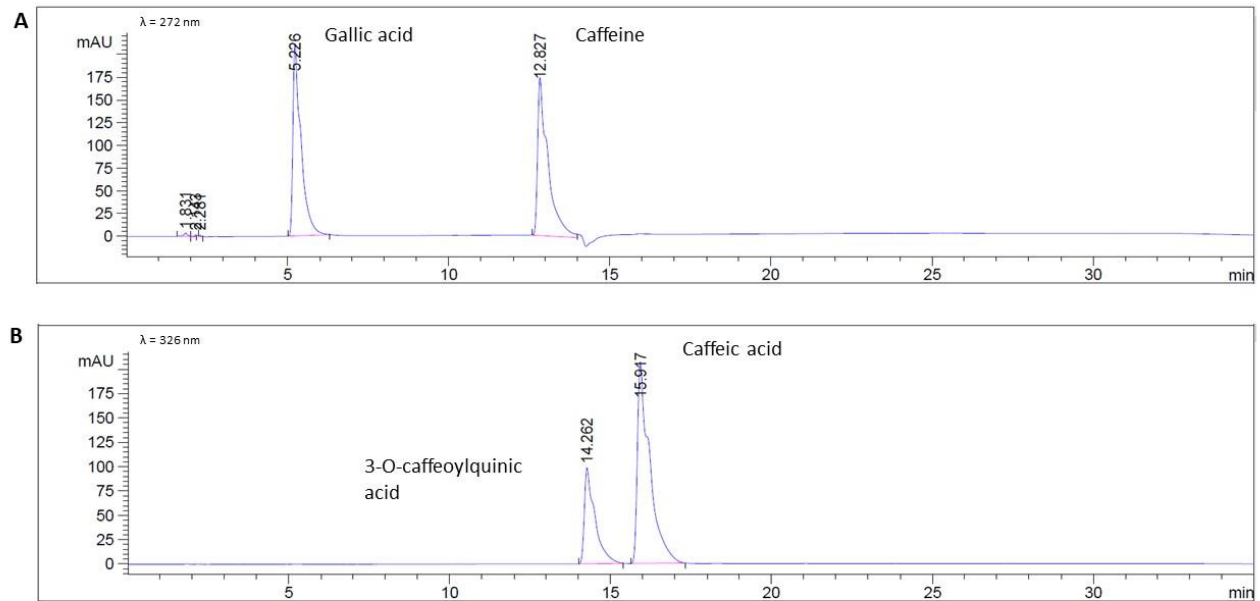

**Supplementary Figure 1.** Chromatograms of the standards and peak identification at (A)  $\lambda = 272$  nm and (B)  $\lambda = 326$  nm.

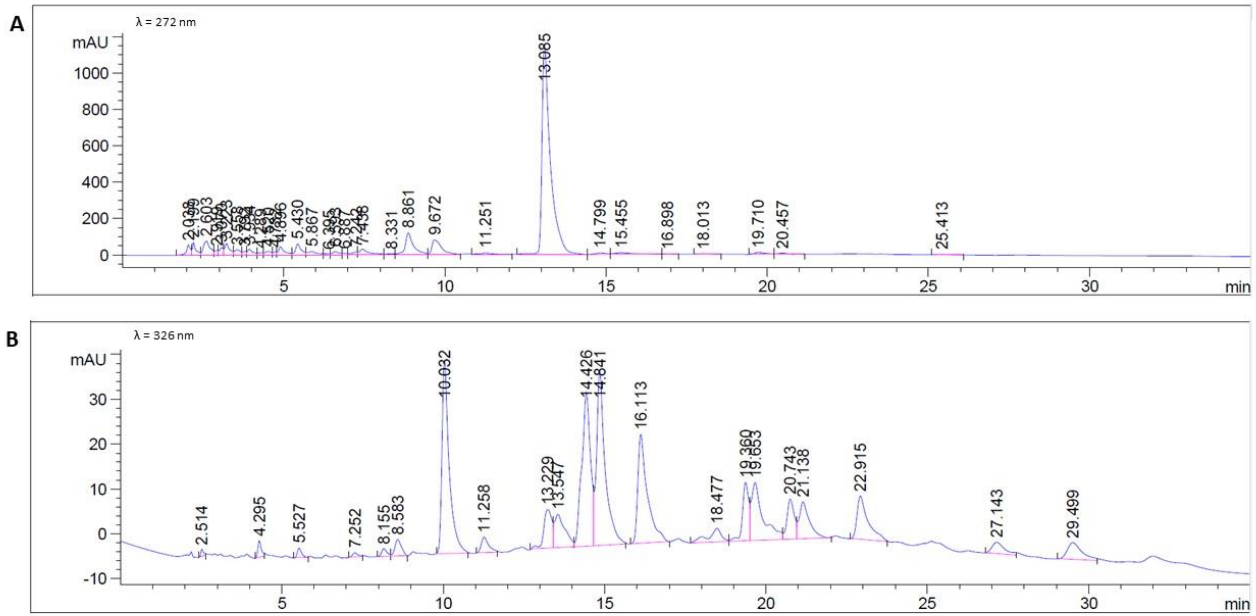

**Supplementary Figure 2.** Chromatograms of the aqueous extract at (A)  $\lambda = 272 \text{ nm}$  and (B)  $\lambda = 326 \text{ nm}$ .

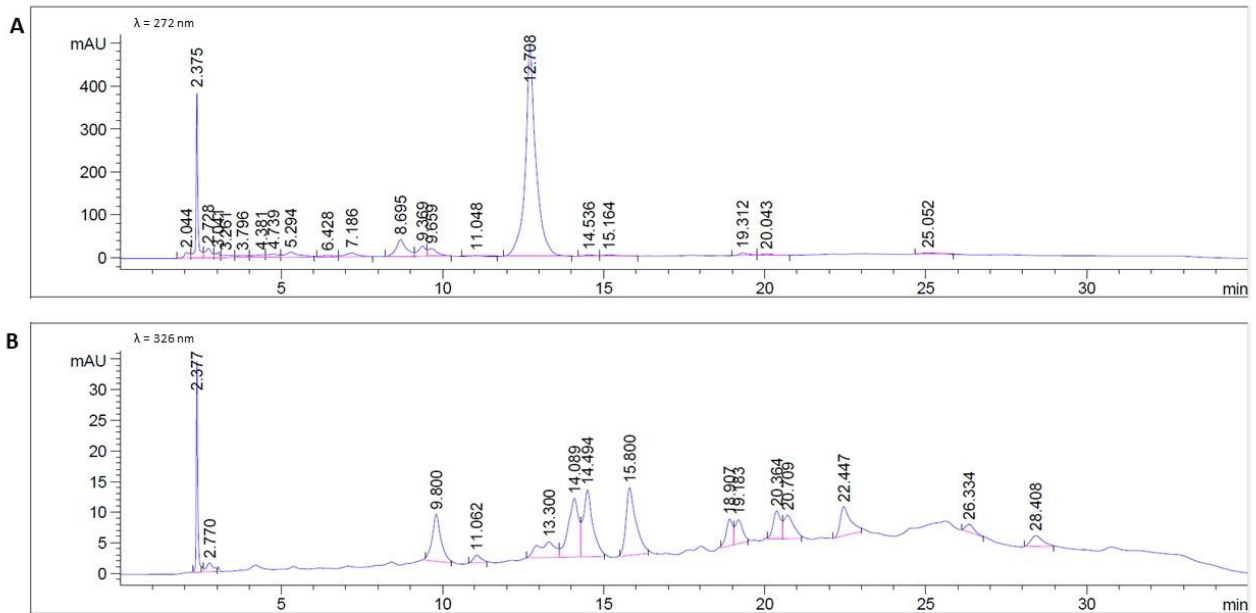

**Supplementary Figure 3.** Chromatograms of the ethanolic extract at (A)  $\lambda = 272 \text{ nm}$  and (B)  $\lambda = 326 \text{ nm}$ .

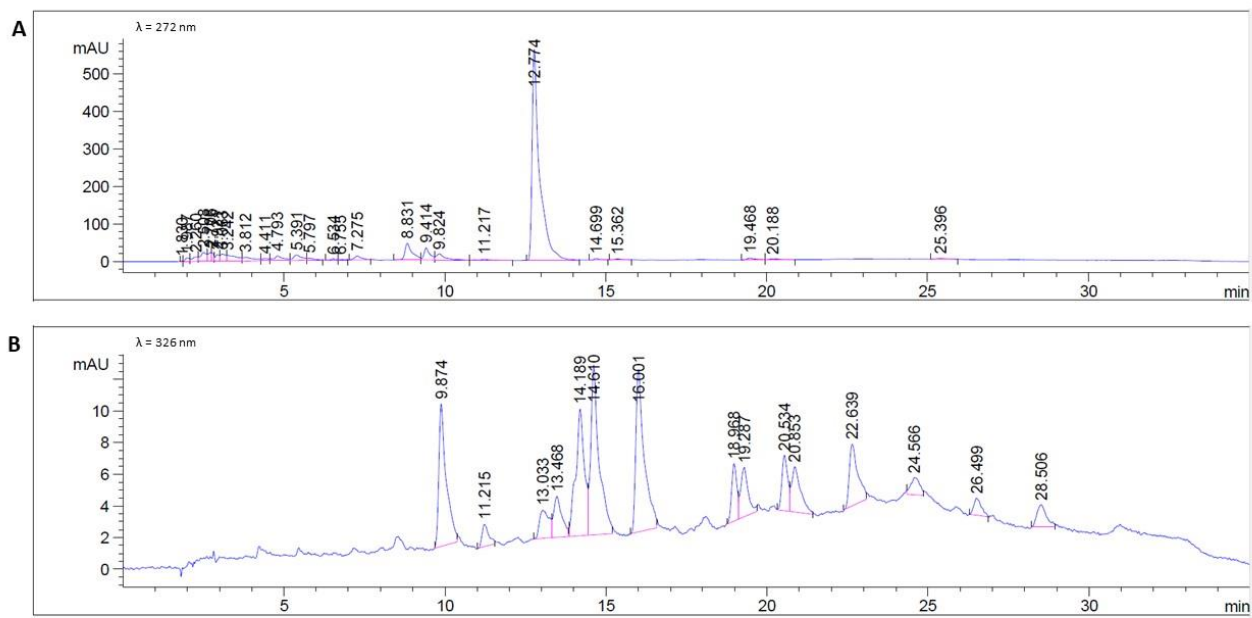

**Supplementary Figure 4.** Chromatograms of the Bet:Teg 60% extract at (A)  $\lambda = 272 \text{ nm}$  and (B)  $\lambda = 326 \text{ nm}$ .

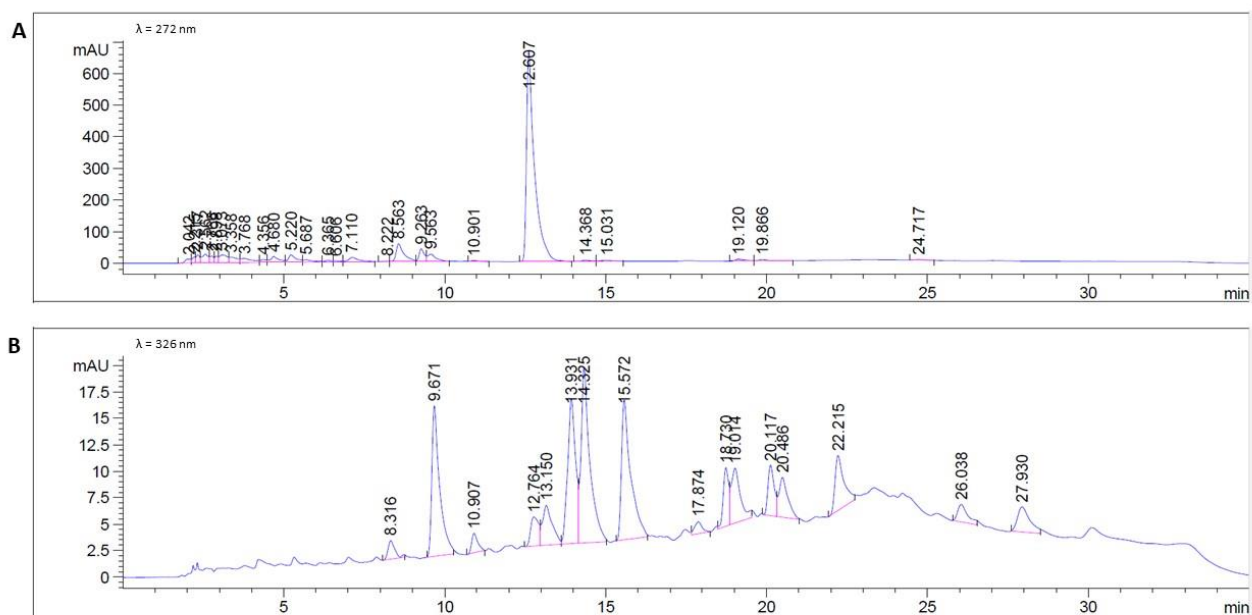

**Supplementary Figure 5.** Chromatograms of the Chol:Prop 50% extract at (A)  $\lambda = 272 \text{ nm}$  and (B)  $\lambda = 326 \text{ nm}$ .
